# Supplementary material
Source: Springer Nature journal article supplement (https://www.springermedizin.de/resource/supplementary/13058_2013_3433_MOESM2_ESM.pdf/9704168)
Supplement: MOESM2 [file 9704168]

**Supplementary Table S1:** Clinico-pathological parameters for the three cohorts of breast cancer patients utilized in this study

| Variables               | Cohort 1                  | Cohort 2                        | Cohort 3               |
|-------------------------|---------------------------|---------------------------------|------------------------|
|                         | Houston RPPA<br>(n = 712) | Consecutive<br>TMA<br>(n = 512) | TCGA RPPA<br>(n = 410) |
| <b>Age at Diagnosis</b> |                           |                                 |                        |
| Median (Range)          | 60 (23 - 89)              | 65 (27 - 96)                    | 58 (26 - 89)           |
| Missing                 | 136 (19.1%)               | -                               | -                      |
| <b>Survival Data</b>    |                           |                                 |                        |
| Available               | 575 (80.8%)               | 439 (85.7%)                     | -                      |
| Missing                 | 137 (19.2%)               | 73 (14.3%)                      | -                      |
| <b>Tumor Size</b>       |                           |                                 |                        |
| ≤2cm                    | 179 (25.1%)               | 267 (60.4%)                     | -                      |
| >2cm                    | 246 (34.6%)               | 175 (39.6%)                     | -                      |
| Missing                 | 287 (40.3%)               | -                               | -                      |
| <b>Tumor Grade</b>      |                           |                                 |                        |
| I                       | 65 (9.1%)                 | 107 (24.2%)                     | -                      |
| II                      | 149 (20.9%)               | 180 (40.7%)                     | -                      |
| III                     | 243 (34.1%)               | 154 (34.8%)                     | -                      |
| Missing                 | 255 (35.8%)               | 1 (0.2%)                        | -                      |
| <b>Nodal status</b>     |                           |                                 |                        |
| N0                      | 283 (39.7%)               | 246 (55.7%)                     | 161 (39.3%)            |
| N1+                     | 255 (35.8%)               | 148 (33.5%)                     | 171 (41.7%)            |
| Missing                 | 174 (24.4%)               | 48 (10.9%)                      | 78 (19.0%)             |
| <b>ER status*</b>       |                           |                                 |                        |
| ER negative             | 262 (36.8%)               | 65 (14.7%)                      | 99 (24.1%)             |
| ER positive             | 429 (60.3%)               | 353 (79.9%)                     | 304 (74.1%)            |
| Missing                 | 21 (2.9%)                 | 24 (5.4%)                       | 7 (1.7%)               |
| <b>PR status</b>        |                           |                                 |                        |
| PR negative             | 367 (51.5%)               | 125 (28.3%)                     | 156 (38.0%)            |
| PR positive             | 333 (46.8%)               | 203 (45.9%)                     | 247 (60.2%)            |
| Missing                 | 12 (1.7%)                 | 114 (25.8%)                     | 7 (1.7%)               |
| <b>Her2 status</b>      |                           |                                 |                        |
| Her2 Negative           | 561 (78.8%)               | 376 (85.1%)                     | 217 (52.9%)            |
| Her2 Positive           | 140 (19.7%)               | 43 (9.7%)                       | 74 (18.0%)             |
| Missing                 | 11 (1.5%)                 | 23 (5.2%)                       | 19 (29.0%)             |

\*ER status was determined by 10% positively stained nuclei from independent histological scoring.

**Supplementary Table S2:** Association of PRDX1 expression with clinicopathological parameters in the RPPA cohort (cohort 1)

| Variables               | PRDX1 Protein Expression <sup>#</sup> |                 | p-value |
|-------------------------|---------------------------------------|-----------------|---------|
|                         | Low<br>(n=356)                        | High<br>(n=356) |         |
| <b>Age at Diagnosis</b> |                                       |                 | <0.001  |
| ≤50                     | 93 (33.5)                             | 61 (20.5)       |         |
| >50                     | 185 (66.5)                            | 237 (79.5)      |         |
| Missing                 | 78                                    | 58              |         |
| <b>Tumor Size</b>       |                                       |                 | 0.138   |
| ≤2cm                    | 91 (38.7)                             | 88 (46.3)       |         |
| >2cm                    | 144 (61.3)                            | 102 (53.7)      |         |
| Missing                 | 121                                   | 166             |         |
| <b>Tumor Grade</b>      |                                       |                 | <0.001* |
| I                       | 25 (10)                               | 40 (19.2)       |         |
| II                      | 71 (28.5)                             | 78 (37.5)       |         |
| III                     | 153 (153)                             | 90 (43.3)       |         |
| Missing                 | 107                                   | 148             |         |
| <b>Nodal status</b>     |                                       |                 | 0.07    |
| N0                      | 124 (48.4)                            | 159 (56.4)      |         |
| N1+                     | 132 (51.6)                            | 123 (43.6)      |         |
| Missing                 | 100                                   | 74              |         |
| <b>ER status</b>        |                                       |                 | 0.05    |
| ER negative             | 143 (41.7)                            | 119 (34.2)      |         |
| ER positive             | 200 (58.3)                            | 229 (65.8)      |         |
| Missing                 | 13                                    | 8               |         |
| <b>PR status</b>        |                                       |                 | 0.291   |
| PR negative             | 190 (54.4)                            | 177 (50.4)      |         |
| PR positive             | 159 (45.6)                            | 174 (49.6)      |         |
| Missing                 | 7                                     | 5               |         |
| <b>Her2 status</b>      |                                       |                 | 0.001   |
| FISH negative           | 262 (75.1)                            | 299 (84.9)      |         |
| FISH positive           | 87 (24.9)                             | 53 (15.1)       |         |
| Missing                 | 7                                     | 4               |         |

\*Linear-by-linear  $\chi^2$  analysis; Others by Fisher's Exact test

<sup>#</sup>PRDX1 protein expression levels are stratified by the median protein expression value.

**Supplementary Table S3:** Association of PRDX1 expression with clinicopathological parameters in the consecutive cohort (cohort 2)

| Variables                | PRDX1 Protein Expression <sup>#</sup> |                 | p-value |
|--------------------------|---------------------------------------|-----------------|---------|
|                          | Low<br>(n=221)                        | High<br>(n=221) |         |
| <b>Age at Diagnosis</b>  |                                       |                 | 0.066   |
| ≤50                      | 42 (19.0)                             | 27 (12.2)       |         |
| >50                      | 179 (81.0)                            | 194 (87.8)      |         |
| <b>Tumor Size</b>        |                                       |                 | 0.011   |
| ≤2cm                     | 120 (54.3)                            | 147 (66.5)      |         |
| >2cm                     | 101(45.7)                             | 74 (33.5)       |         |
| <b>Histological type</b> |                                       |                 | 0.003*  |
| Indeterminate            | 13 (5.9)                              | 14 (6.3)        |         |
| Ductal                   | 159 (71.9)                            | 131 (59.3)      |         |
| Lobular                  | 23 (10.4)                             | 45 (20.4)       |         |
| Tubular                  | 10 (4.5)                              | 18 (8.1)        |         |
| Medullary                | 11 (5.0)                              | 3 (1.4)         |         |
| Mucinous                 | 5 (2.3)                               | 10 (4.5)        |         |
| <b>Tumor Grade</b>       |                                       |                 | 0.002*  |
| I                        | 40 (18.2)                             | 67 (30.3)       |         |
| II                       | 88 (40.0)                             | 92 (41.6)       |         |
| III                      | 92 (41.8)                             | 62 (28.1)       |         |
| Missing                  | 1                                     | 0               |         |
| <b>Nodal status</b>      |                                       |                 | 0.755   |
| N0                       | 126 (63.3)                            | 120 (61.5)      |         |
| N1+                      | 73 (36.7)                             | 75 (38.5)       |         |
| Missing                  | 22                                    | 26              |         |
| <b>ER status</b>         |                                       |                 | 0.043   |
| ER negative              | 40 (19.2)                             | 25 (11.9)       |         |
| ER positive              | 168 (80.8)                            | 185 (88.1)      |         |
| Missing                  | 13                                    | 11              |         |
| <b>PR status</b>         |                                       |                 | 0.307   |
| PR negative              | 68 (41)                               | 57 (35.2)       |         |
| PR positive              | 98 (59)                               | 105 (64.8)      |         |
| Missing                  | 55                                    | 60              |         |
| <b>Her2 status</b>       |                                       |                 | 0.151   |
| 0 - 2 +                  | 183 (87.6)                            | 193 (91.9)      |         |
| 3+                       | 26 (12.4)                             | 17 (8.1)        |         |
| Missing                  | 12                                    | 11              |         |
| <b>Ki67 status</b>       |                                       |                 | 0.004   |
| 0 – 10%                  | 60 (29.3)                             | 90 (43.3)       |         |
| 11 - 100%                | 145 (70.7)                            | 118 (56.7)      |         |
| Missing                  | 16                                    | 13              |         |

\*Linear-by-linear  $\chi^2$  analysis; Others by Fisher's Exact test

<sup>#</sup>PRDX1 protein expression levels are stratified by the median protein expression value.

**Supplementary Table S4:** Proteins that correlate with PRDX1 protein expression in the ER-positive and/or ER-negative cohort

|                                             | Protein                | ER-positive<br>(n = 304) |               | ER-negative<br>(n = 99) |               |
|---------------------------------------------|------------------------|--------------------------|---------------|-------------------------|---------------|
|                                             |                        | p                        | r             | p                       | r             |
| <b>Correlate in ER-positive tumors only</b> | ACC-pS79               | 0.045                    | 0.115         | 0.063                   | -0.188        |
|                                             | ACC1                   | 0.000                    | 0.288         | 0.985                   | -0.002        |
|                                             | <b>Akt-pS473</b>       | <b>0.011</b>             | <b>-0.146</b> | <b>0.254</b>            | <b>-0.116</b> |
|                                             | <b>Akt-pT308</b>       | <b>0.001</b>             | <b>-0.190</b> | <b>0.805</b>            | <b>0.025</b>  |
|                                             | B.Raf                  | 0.012                    | 0.143         | 0.455                   | -0.076        |
|                                             | Beclin                 | 0.011                    | -0.146        | 0.322                   | 0.101         |
|                                             | Bid                    | 0.000                    | -0.233        | 0.295                   | -0.106        |
|                                             | Bim                    | 0.000                    | 0.199         | 0.055                   | 0.193         |
|                                             | c.Met                  | 0.000                    | -0.314        | 0.054                   | -0.194        |
|                                             | c.Met-pY1235           | 0.002                    | -0.177        | 0.138                   | 0.150         |
|                                             | CDK1                   | 0.027                    | -0.127        | 0.294                   | 0.107         |
|                                             | Chk2                   | 0.000                    | 0.229         | 0.503                   | -0.068        |
|                                             | cIAP                   | 0.001                    | 0.192         | 0.267                   | 0.113         |
|                                             | Collagen-VI            | 0.000                    | -0.232        | 0.136                   | -0.151        |
|                                             | COX.2                  | 0.002                    | -0.174        | 0.355                   | 0.094         |
|                                             | Cyclin-B1              | 0.002                    | 0.177         | 0.312                   | 0.103         |
|                                             | Cyclin-E1              | 0.000                    | 0.264         | 0.087                   | 0.173         |
|                                             | <b>E.Cadherin</b>      | <b>0.007</b>             | <b>0.154</b>  | <b>0.255</b>            | <b>-0.116</b> |
|                                             | eEF2                   | 0.000                    | 0.237         | 0.264                   | -0.113        |
|                                             | EGFR                   | 0.000                    | -0.240        | 0.410                   | -0.084        |
|                                             | EGFR-pY1068            | 0.011                    | -0.145        | 0.287                   | -0.108        |
|                                             | EGFR-pY1173            | 0.000                    | -0.218        | 0.921                   | -0.010        |
|                                             | EGFR-pY992             | 0.001                    | -0.198        | 0.566                   | -0.058        |
|                                             | <b>ER-alpha</b>        | <b>0.024</b>             | <b>0.129</b>  | <b>0.707</b>            | <b>0.038</b>  |
|                                             | FAK                    | 0.011                    | -0.146        | 0.102                   | -0.165        |
|                                             | Fibronectin            | 0.007                    | -0.153        | 0.171                   | 0.139         |
|                                             | FOXO3a                 | 0.023                    | -0.130        | 0.648                   | -0.046        |
|                                             | GSK3.alpha.beta        | 0.000                    | 0.325         | 0.329                   | -0.099        |
|                                             | HER3-pY1298            | 0.009                    | -0.150        | 0.241                   | -0.119        |
|                                             | HSP70                  | 0.000                    | -0.265        | 0.942                   | -0.007        |
|                                             | IRS1                   | 0.000                    | -0.247        | 0.090                   | -0.171        |
|                                             | K.Ras                  | 0.001                    | -0.192        | 0.731                   | -0.035        |
|                                             | <b>MAPK-pT202-Y204</b> | <b>0.002</b>             | <b>-0.179</b> | <b>0.096</b>            | <b>-0.168</b> |
|                                             | MIG.6                  | 0.001                    | 0.186         | 0.388                   | 0.088         |
|                                             | Mre11                  | 0.002                    | -0.174        | 0.120                   | 0.157         |
|                                             | NF2                    | 0.038                    | 0.119         | 0.145                   | 0.148         |
|                                             | Notch1                 | 0.018                    | -0.136        | 0.761                   | -0.031        |
|                                             | p21                    | 0.025                    | -0.129        | 0.111                   | -0.161        |
|                                             | p38-MAPK               | 0.002                    | 0.177         | 0.235                   | 0.120         |
|                                             | p70S6K                 | 0.039                    | 0.119         | 0.989                   | 0.001         |
|                                             | PARP-cleaved           | 0.027                    | -0.127        | 0.152                   | 0.145         |
|                                             | PDK1-pS241             | 0.004                    | 0.163         | 0.928                   | -0.009        |
|                                             | PI3K.p110.alpha        | 0.000                    | 0.334         | 0.638                   | 0.048         |
|                                             | PKC.alpha              | 0.041                    | -0.117        | 0.281                   | -0.109        |
|                                             | PKC.alpha-pS657        | 0.016                    | -0.138        | 0.451                   | -0.077        |
|                                             | Rb                     | 0.000                    | -0.222        | 0.671                   | 0.043         |
|                                             | S6                     | 0.000                    | 0.248         | 0.215                   | 0.126         |
| S6-pS240-S244                               | 0.028                  | 0.126                    | 0.811         | -0.024                  |               |
| Src-pY527                                   | 0.000                  | -0.206                   | 0.621         | -0.050                  |               |
| STAT3-pY705                                 | 0.000                  | -0.202                   | 0.401         | 0.085                   |               |
| Stathmin                                    | 0.002                  | -0.179                   | 0.239         | 0.119                   |               |
| Syk                                         | 0.003                  | 0.172                    | 0.115         | 0.159                   |               |
| VEGFR2                                      | 0.000                  | 0.271                    | 0.774         | 0.029                   |               |
| X4E.BP1                                     | 0.000                  | 0.200                    | 0.566         | 0.058                   |               |
| XBP1                                        | 0.000                  | -0.204                   | 0.297         | -0.106                  |               |
| YAP                                         | 0.000                  | -0.202                   | 0.722         | -0.036                  |               |

|                                                            |                         |              |        |              |        |
|------------------------------------------------------------|-------------------------|--------------|--------|--------------|--------|
| <b>Correlate in opposite direction across both cohorts</b> | C.Raf                   | <i>0.004</i> | 0.163  | <i>0.011</i> | -0.254 |
|                                                            | C.Raf-pS338             | <i>0.005</i> | -0.162 | <i>0.015</i> | 0.244  |
|                                                            | CD31                    | <i>0.043</i> | -0.116 | <i>0.004</i> | 0.288  |
|                                                            | Chk1-pS345              | <i>0.004</i> | -0.164 | <i>0.011</i> | 0.255  |
|                                                            | mTOR                    | <i>0.000</i> | 0.224  | <i>0.039</i> | -0.208 |
|                                                            | Rab25                   | <i>0.005</i> | -0.160 | <i>0.003</i> | 0.295  |
|                                                            | SETD2                   | <i>0.047</i> | -0.114 | <i>0.002</i> | 0.306  |
|                                                            | Snail                   | <i>0.005</i> | -0.161 | <i>0.006</i> | 0.274  |
| <b>Correlate in the same direction across both cohorts</b> | A.Raf-pS299             | <i>0.000</i> | 0.272  | <i>0.001</i> | 0.320  |
|                                                            | Bax                     | <i>0.003</i> | 0.172  | <i>0.001</i> | 0.337  |
|                                                            | Bcl.xL                  | <i>0.004</i> | 0.165  | <i>0.001</i> | 0.334  |
|                                                            | c.Jun-pS73              | <i>0.000</i> | -0.315 | <i>0.002</i> | -0.312 |
|                                                            | c.Myc                   | <i>0.000</i> | -0.260 | <i>0.001</i> | -0.315 |
|                                                            | Caspase.7-cleavedD198   | <i>0.018</i> | 0.136  | <i>0.000</i> | 0.344  |
|                                                            | Caveolin.1              | <i>0.010</i> | -0.148 | <i>0.021</i> | -0.232 |
|                                                            | CD49b                   | <i>0.019</i> | 0.135  | <i>0.045</i> | 0.202  |
|                                                            | Claudin.7               | <i>0.000</i> | 0.284  | <i>0.023</i> | 0.228  |
|                                                            | DJ.1                    | <i>0.002</i> | 0.177  | <i>0.003</i> | 0.292  |
|                                                            | eIF4E                   | <i>0.000</i> | 0.214  | <i>0.011</i> | 0.255  |
|                                                            | MEK1-pS217-S221         | <i>0.034</i> | -0.121 | <i>0.001</i> | -0.323 |
|                                                            | Notch3                  | <i>0.000</i> | -0.218 | <i>0.024</i> | -0.226 |
|                                                            | Paxillin                | <i>0.023</i> | -0.130 | <i>0.000</i> | -0.500 |
|                                                            | PCNA                    | <i>0.000</i> | 0.276  | <i>0.002</i> | 0.305  |
|                                                            | PTCH                    | <i>0.000</i> | -0.210 | <i>0.001</i> | -0.343 |
|                                                            | RBM3                    | <i>0.000</i> | 0.215  | <i>0.026</i> | 0.224  |
|                                                            | Smac                    | <i>0.000</i> | 0.351  | <i>0.003</i> | 0.298  |
|                                                            | Transglutaminase        | <i>0.018</i> | 0.135  | <i>0.008</i> | 0.266  |
|                                                            | VASP                    | <i>0.000</i> | 0.265  | <i>0.000</i> | 0.389  |
|                                                            | XIAP                    | <i>0.001</i> | -0.190 | <i>0.022</i> | -0.231 |
|                                                            | XRCC1                   | <i>0.001</i> | 0.197  | <i>0.008</i> | 0.265  |
| <b>Correlate in ER-negative tumors only</b>                | X53BP1                  | 0.695        | -0.023 | <i>0.005</i> | -0.282 |
|                                                            | Akt                     | 0.790        | 0.015  | <i>0.002</i> | -0.311 |
|                                                            | AMPK-pT172              | 0.671        | 0.024  | <i>0.050</i> | -0.198 |
|                                                            | ATM                     | 0.749        | 0.018  | <i>0.050</i> | -0.198 |
|                                                            | beta.Catenin            | 0.363        | 0.052  | <i>0.006</i> | -0.274 |
|                                                            | Caspase.8               | 0.391        | 0.049  | <i>0.048</i> | 0.199  |
|                                                            | Chk1                    | 0.142        | -0.084 | <i>0.001</i> | 0.324  |
|                                                            | eEF2K                   | 0.817        | -0.013 | <i>0.015</i> | -0.243 |
|                                                            | ERK2                    | 0.516        | 0.037  | <i>0.000</i> | -0.350 |
|                                                            | GAB2                    | 0.067        | 0.105  | <i>0.014</i> | -0.245 |
|                                                            | GSK3.alpha.beta-pS21-S9 | 0.634        | -0.027 | <i>0.005</i> | -0.279 |
|                                                            | IGF.1R.beta             | 0.856        | 0.010  | <i>0.011</i> | -0.255 |
|                                                            | Ku80                    | 0.405        | 0.048  | <i>0.000</i> | -0.362 |
|                                                            | LBK1                    | 0.203        | -0.073 | <i>0.045</i> | 0.202  |
|                                                            | Lck                     | 0.405        | 0.048  | <i>0.020</i> | 0.234  |
|                                                            | MSH2                    | 0.208        | 0.072  | <i>0.019</i> | -0.236 |
|                                                            | p27-pT157               | 0.284        | -0.062 | <i>0.044</i> | 0.203  |
|                                                            | p90RSK-pT359-S363       | 0.101        | -0.094 | <i>0.001</i> | -0.317 |
|                                                            | Pea.15                  | 0.893        | 0.008  | <i>0.000</i> | 0.345  |
|                                                            | Rad50                   | 0.832        | -0.012 | <i>0.030</i> | -0.218 |
|                                                            | Rad51                   | 0.685        | -0.023 | <i>0.010</i> | 0.256  |
|                                                            | Src-pY416               | 0.404        | -0.048 | <i>0.001</i> | 0.325  |
|                                                            | STAT5.alpha             | 0.379        | -0.051 | <i>0.002</i> | -0.310 |
|                                                            | Tuberin                 | 0.703        | 0.022  | <i>0.000</i> | -0.444 |
|                                                            | X14.3.3-epsilon         | 0.143        | 0.084  | <i>0.002</i> | 0.313  |
|                                                            | X4E.BP1-pT37            | 0.353        | -0.053 | <i>0.013</i> | -0.248 |

Significant value ( $p < 0.05$ ) highlighted in *italics*. Pearson's correlation values represented by  $r$ .
